# Supplementary material for: Self-supported Pt nanoclusters via galvanic replacement from Cu2O nanocubes as efficient electrocatalysts
Source: Royal Society of Chemistry journal article supplement (doi:10.1039/c3nr02243a), 2013-01-01
Supplement: c3nr02243a.pdf [file c3nr02243a.pdf]

## Electronic Supplemental Information

### Self-supported Pt nanoclusters *via* galvanic replacement from Cu<sub>2</sub>O nanocubes as efficient electrocatalysts

Qing Li,<sup>ac</sup> Ping Xu,<sup>\*ab</sup> Bin Zhang,<sup>a</sup> Gang Wu,<sup>c</sup> Hongtao Zhao,<sup>a</sup> Engang Fu<sup>c</sup> and Hsing-Lin Wang<sup>\*b</sup>

*a* Department of Chemistry, Harbin Institute of Technology, Harbin 150001, China. Fax: 86-451-86418750; Tel: 86-451-86413702; E-mail: pxu@hit.edu.cn

*b* Chemistry Division, Los Alamos National Laboratory, Los Alamos, NM 87545, USA. Tel: 1-505-665-6811; E-mail: hwang@lanl.gov

*c* Materials Physics and Applications Division, Los Alamos National Laboratory, Los Alamos, NM 87545, USA.

#### Additional Figures:

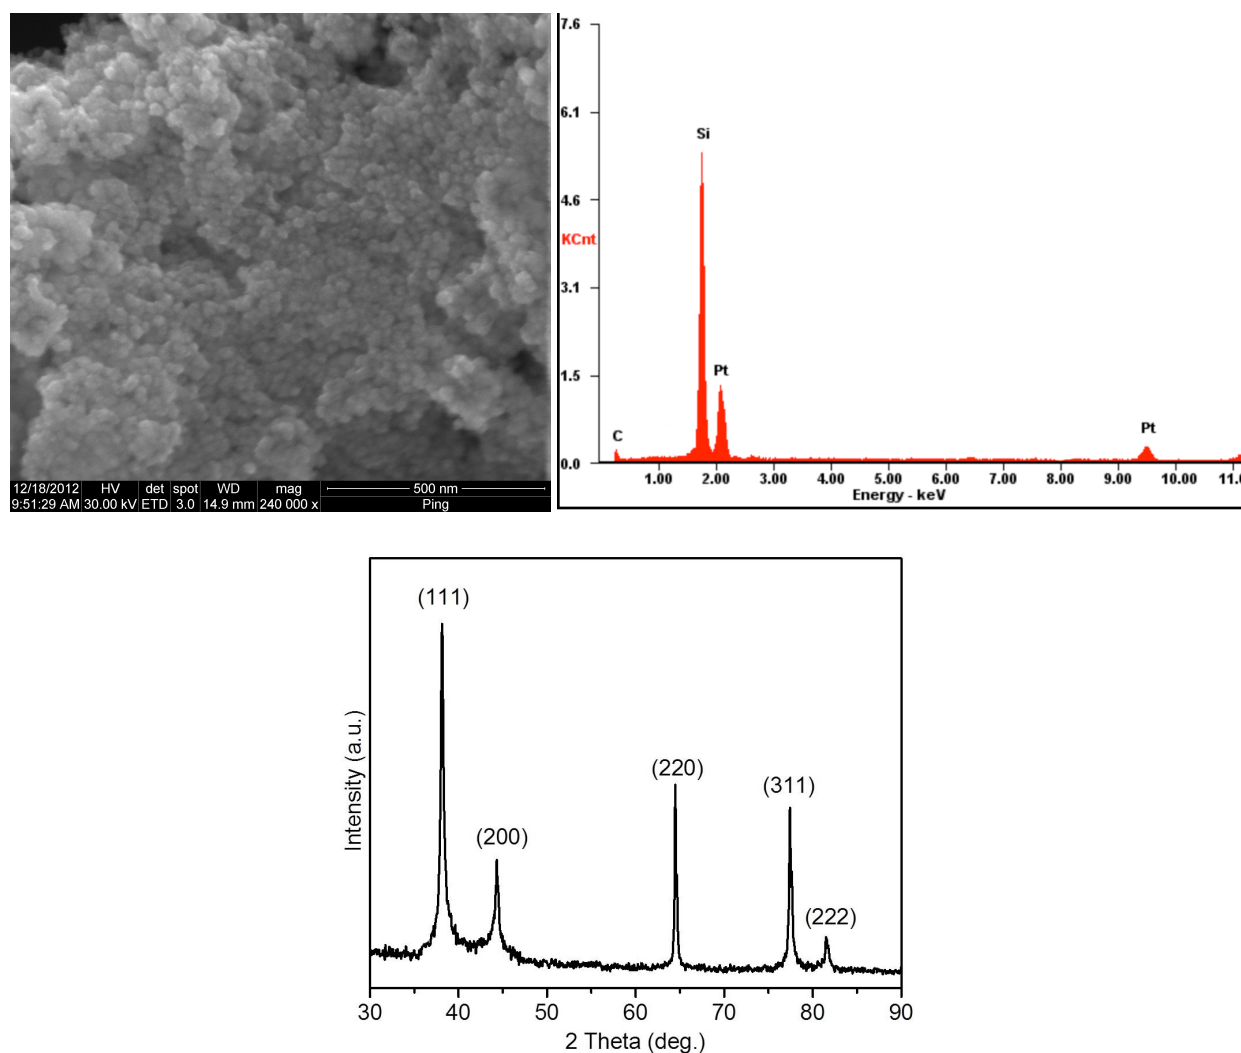

**Fig. S1.** SEM image, Energy dispersive spectrum (EDS) and XRD pattern of the Pt nanoclusters (NCs) prepared from Cu<sub>2</sub>O-PEG with the assistance of acetic acid.

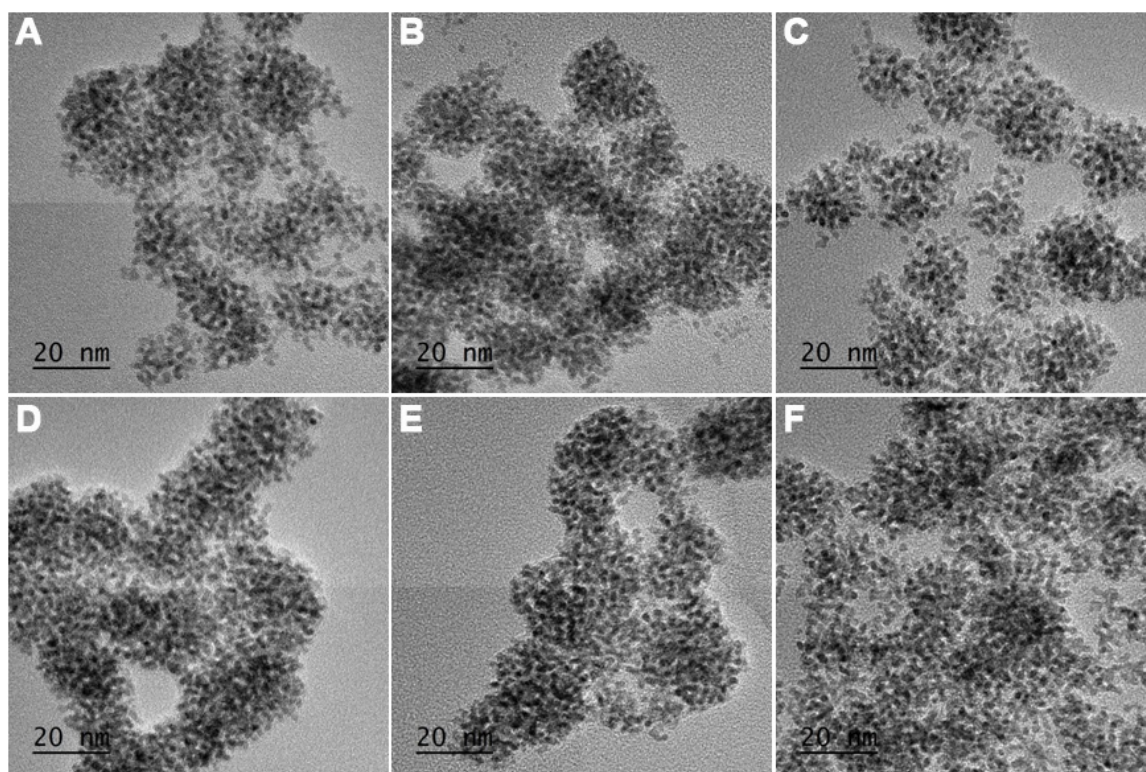

**Fig. S2.** TEM images of the self-supported Pt nanoclusters prepared via galvanic replacement from Cu<sub>2</sub>O with the assistance of citric acid (A), camphorsulfonic acid (B), lactic acid (C), mandelic acid (D), nitric acid (E), and hydrochloric acid (F). All scale bars are 20 nm.

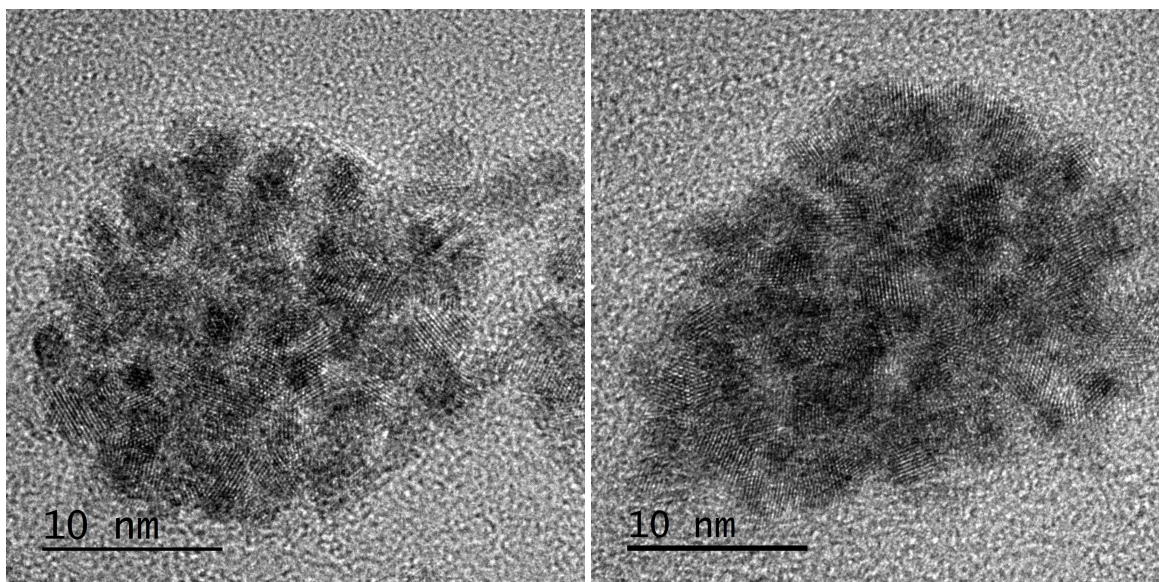

**Fig. S3.** HR-TEM images of the Pt nanoclusters prepared *via* galvanic replacement from Cu<sub>2</sub>O-PEG with the assistance of lactic acid (left) and hydrochloric acid (right).

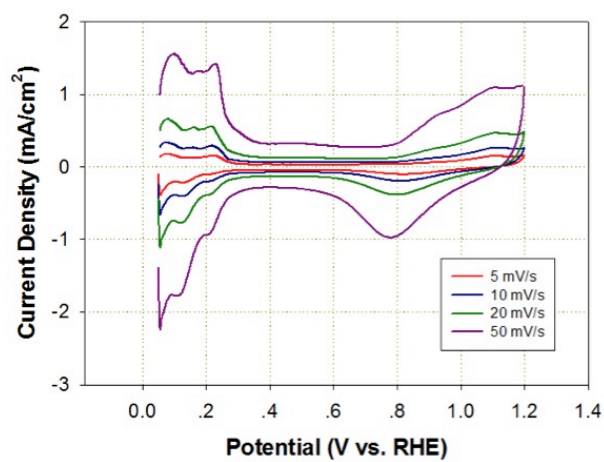

**Fig. S4.** Cyclic voltammograms of the Pt NCs in a N<sub>2</sub>-saturated 0.5 M H<sub>2</sub>SO<sub>4</sub> at different scan rates.

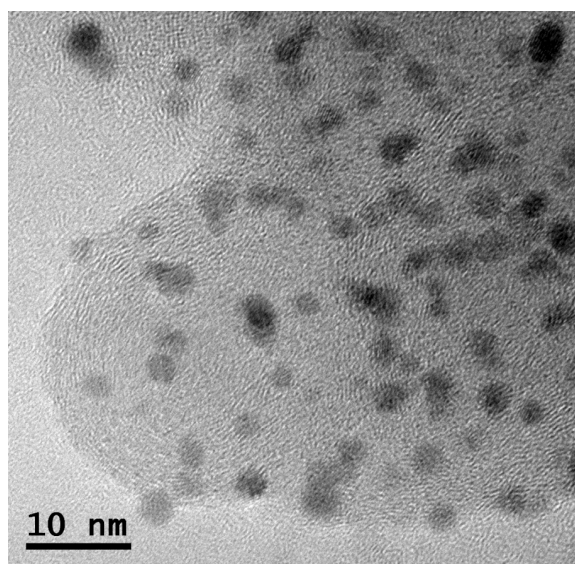

**Fig. S5.** TEM image of the commercial Pt/C before potential cycling tests.



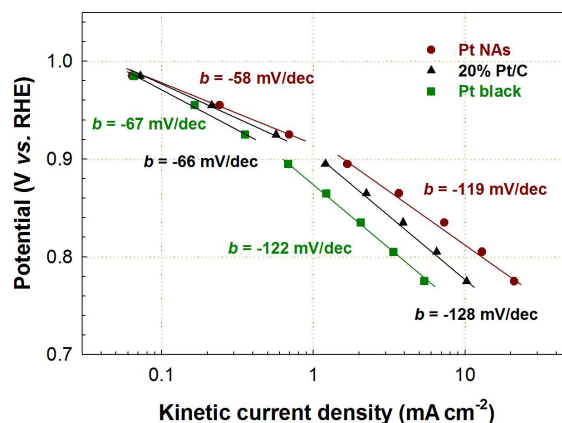

**Fig. S6.** Tafel plots for the ORR on the Pt NCs, the commercial Pt/C and Pt black.

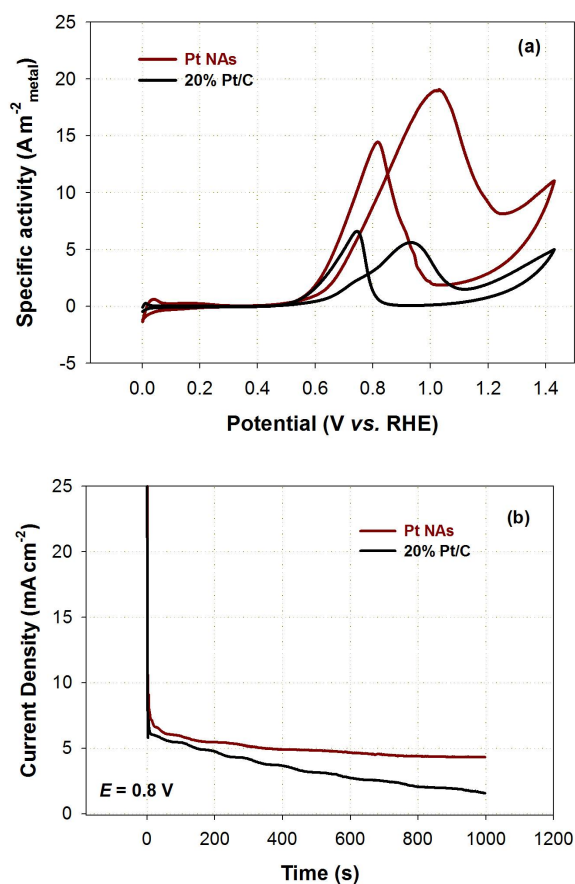

**Fig. S7.** (a) Cyclic voltammograms of the Pt NCs and the commercial Pt/C (20 wt%) at a scan rate of  $10 \text{ mV s}^{-1}$ ; (b) Chronoamperometric curves of the Pt NCs and the commercial Pt/C (20 wt%) recorded at 0.8 V. Electrolyte: 0.5 M  $\text{H}_2\text{SO}_4$  solutions containing 1.0 M methanol.

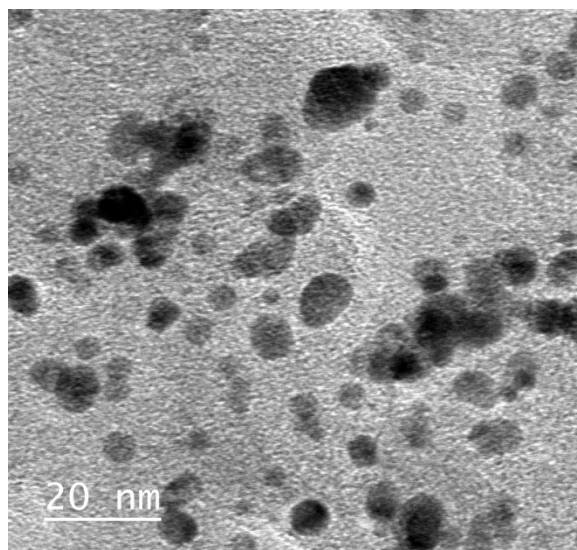

**Fig. S8.** TEM image of the commercial Pt/C after potential cycling tests..

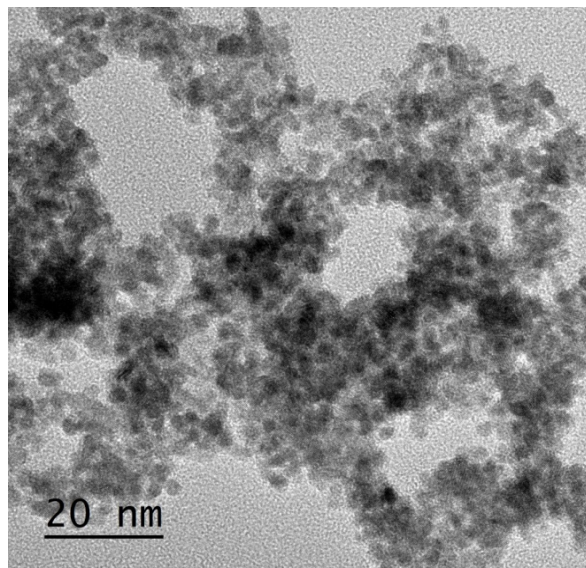

**Fig. S9.** TEM image of the Pt nanoclusters prepared from  $\text{Cu}_2\text{O}$ -PEG with the assistance of acetic acid after potential cycling tests..
